# Sperm DNA fragmentation: paternal effect on early post-implantation embryo development in ART

A.Borini<sup>1,4</sup>, N.Tarozzi<sup>1</sup>, D.Bizzaro<sup>2</sup>, M.A.Bonu<sup>1</sup>, L.Fava<sup>1</sup>, C.Flamigni<sup>3</sup> and G.Coticchio<sup>1</sup>

<sup>1</sup>Tecnobios Procreazione, Centre for Reproductive Health, Via Dante 15, Bologna, <sup>2</sup>Institute of Biology and Genetic, University Polytechnic of Marche, Via Brece Bianche, Ancona and <sup>3</sup>University of Bologna, Bologna, Italy

<sup>4</sup>To whom correspondence should be addressed at: Tecnobios Procreazione, Centre for Reproductive Health, Via Dante 15, I-40125 Bologna, Italy. E-mail: borini@tecnobiosprocreazione.it

**BACKGROUND:** The relationship between early embryo post-implantation development in couples undergoing assisted reproductive techniques (ARTs) and sperm chromatin alterations has not been satisfactorily explained. The aim of this study was to assess the relationship between sperm DNA fragmentation in IVF/ICSI patients, sperm parameters (concentration, motility and morphology) and ART outcome, especially with regard to clinical pregnancy and pregnancy loss (spontaneous miscarriage or biochemical pregnancy). **METHODS:** DNA fragmentation was evaluated by TUNEL assay, performed on sperm suspensions after density gradient separation, in 132 men undergoing an ART cycle (82 IVF and 50 ICSI) and correlated with sperm parameters and ART outcome. **RESULTS:** A highly significant negative correlation was found between DNA fragmentation and sperm parameters. There was a close relationship between DNA fragmentation and post-implantation development in ICSI patients: the clinical pregnancy and pregnancy loss rates significantly differed between patients with high and low sperm DNA fragmentation ( $P = 0.007$  and  $P = 0.009$ , respectively). **CONCLUSIONS:** Sperm DNA fragmentation seems to affect embryo post-implantation development in ICSI procedures: high sperm DNA fragmentation can compromise 'embryo viability', resulting in pregnancy loss.

*Key words:* abortion/ART/DNA fragmentation/human sperm/pregnancy

## Introduction

Many studies have shown how a 'paternal effect' can cause repeated assisted reproductive technique (ART) failures (Vanderzwalmen *et al.*, 1991; Perinaud *et al.*, 1993; Janny and Menezo, 1994; Hammadeh *et al.*, 1996; Sanchez *et al.*, 1996; Shoukir *et al.*, 1998). Many authors have shown how this 'paternal effect' can be traced back to anomalies in sperm chromatin organization: the sperm of subfertile men are characterized by susceptibility to acid-induced denaturation *in situ* (Spano *et al.*, 2000), reduced chromatin condensation (Bianchi *et al.*, 1996), chromosomal anomalies (Moosani *et al.*, 1995) and/or increased DNA strand breaks (Lopes *et al.*, 1998; Irvine *et al.*, 2000). It has been shown how a high percentage of spermatozoa with alterations in chromatin structure has a negative effect on ART procedure outcome (Sun *et al.*, 1997; Lopes *et al.*, 1998; Larson *et al.*, 2000; Morris *et al.*, 2002; Benchaib *et al.*, 2003). These studies have focused on testing for possible correlations between paternal chromatin alterations and fertilization, embryo cleavage, blastocyst development and clinical pregnancy rates, in both IVF and ICSI.

These findings suggest that paternal genomic alterations may compromise not only fertilization and embryo quality but also 'embryo viability' and progression of pregnancy, resulting in spontaneous miscarriage or biochemical pregnancy. To date,

a number of studies in men and animals have highlighted the importance of the 'paternal factor', including male age or paternal exposure to toxic materials, in spontaneous miscarriages (Olshan and Faustman, 1993; Marchetti *et al.*, 1999; Carrell and Liu, 2003; Carrell *et al.*, 2003; Hjollund *et al.*, 2005; Slama *et al.*, 2005), but the relationship between 'early post-implantation embryo development' in couples undergoing ART and sperm DNA integrity still remains to be explained. The effect of altered sperm chromatin integrity on post-embryonic development is therefore still a matter of debate (Larson *et al.*, 2000).

The aim of this study was to examine, in IVF and ICSI patients, the possible relationship between sperm DNA fragmentation, assessed by TUNEL assay, traditional sperm evaluation parameters (concentration, motility and morphology) and ART outcome, especially in regard to clinical pregnancy and, as a new issue, pregnancy loss, the latter defined as spontaneous miscarriage or biochemical pregnancy.

## Subjects and methods

### Patients

The study was carried out at Tecnobios Procreazione, Bologna, Italy. A total of 132 couples undergoing an ART cycle were included: 50 cycles were ICSI and 82 IVF. The mean age of women included in the

study was  $37.05 \pm 4.19$  years and the mean BMI was  $22.17 \pm 3.13$  kg/m<sup>2</sup>. The mean age of men was  $40.24 \pm 5.17$  years. Only men with ejaculated sperm were included in the study.

The indication for ICSI treatment was severe male factor (sperm concentration  $<10 \times 10^6$ /ml and/or sperm motility  $<30\%$  and/or normal sperm morphology  $<4\%$ ). This was associated with oligo-ovulation in 1 couple (2%), endometriosis in 5 couples (10%) and tubal defects in 10 couples (20%); aetiology of infertility was only male factor in 27 couples (54%) and unexplained in 7 couples (14%). In IVF patients, the aetiology of infertility was oligo-ovulation in 2 couples (2.4%), endometriosis in 14 couples (17.1%), unexplained in 17 couples (20.7%), tubal defects in 39 couples (47.6%) and male factor in 10 couples (12.2%).

#### Sperm collection and preparation

Sperm samples were collected by masturbation. Samples were analysed following WHO indications (WHO, 1999) for total sperm number, concentration, motility and morphology and were prepared using a discontinuous PureSperm gradient (Nidacon, Gothenberg, Sweden). Briefly, sperm was layered upon a 40:80% PureSperm density gradient, processed by centrifuge at  $600 \times g$  for 15 min and resuspended in 1 ml of sperm culture medium (PureSperm wash, Nidacon, Gothenberg, Sweden). After density gradient separation, a second evaluation of concentration, motility and morphology was performed.

#### Ovarian stimulation, IVF, ICSI and embryo development

Ovarian stimulation was achieved by recombinant FSH (Gonal F, Serono, Rome, Italy; Puregon, Organon, Rome, Italy) and monitored by endovaginal echography and plasma estradiol. Thirty-six hours before oocyte retrieval, 10 000 IU of hCG (Gonasi, Amsa, Rome, Italy) was administered. Oocyte retrieval was carried out under general anaesthesia by a vaginal ultrasonography-guided aspiration. At 16–18 h after insemination or microinjection, as previously described (Borini *et al.*, 2004a,b), oocytes were assessed for two PN presence. Forty-eight hours after oocyte retrieval, embryos were classified according to morphology and then transferred into the uterus. Clinical pregnancy was determined by ultrasound detection of gestational sac and biochemical pregnancy by the presence of only one positive  $\beta$ -hCG measurement.

#### DNA fragmentation analysis

Terminal deoxynucleotidyl transferase-mediated deoxyuridine triphosphate (dUTP) *in situ* DNA nick end labelling (TUNEL) assay was performed on sperm suspension after density gradient separation as previously described by Benchaib *et al.* (2003). Briefly, part of the sperm sample was used for oocyte insemination, whereas the other part of semen suspension was washed in phosphate-buffered saline (PBS) (Sigma-Aldrich, Milan, Italy), smeared onto microscope slides, fixed in 4% paraformaldehyde (Sigma-Aldrich) in PBS for 30 min at 4°C and permeabilized with 0.1% Triton X-100 in 0.1% sodium citrate (Sigma-Aldrich). Strand breaks in DNA were detected by TUNEL using a commercially available kit (*In situ* Cell Death Detection Kit, Fluorescein, Roche, Monza, Italy) according to the manufacturer's instructions. A negative control was performed for each sample by using fluorescein isothiocyanate (FITC)-labelled dUTP without enzyme. The percentage of spermatozoa with fragmented DNA was determined by direct observation of 500 spermatozoa per sample with an epifluorescence microscope (NIKON eclipse 80i, Florence, Italy).

IVF patients were divided in two groups: group A ( $n = 69$ ), low TUNEL patients (TUNEL positivity  $<10\%$ ); group B ( $n = 13$ ), high TUNEL patients (TUNEL positivity  $\geq 10\%$ ). ICSI patients were also

divided in two groups: group C ( $n = 20$ ), low TUNEL patients (TUNEL positivity  $<10\%$ ); group D ( $n = 30$ ), high TUNEL patients (TUNEL positivity  $\geq 10\%$ ). The threshold value of 10% was chosen in line with the previous study of Benchaib *et al.* (2003) performed using the same technique for sperm preparation (density gradient separation with PureSperm) and for detection of DNA damage on the sperm suspension obtained in this manner (TUNEL assay and evaluation of positive sperms with epifluorescence microscope).

#### Outcome definitions and statistical analysis

- (i) Clinical pregnancy rate was defined as the number of patients with fetal heartbeat divided by the number of treatments;
- (ii) Biochemical pregnancy rate was the number of biochemical pregnancies divided by the number of  $\beta$ -HCG positive patients;
- (iii) Spontaneous miscarriage rate was the number of spontaneous miscarriages divided by the number of  $\beta$ -HCG positive patients;
- (iv) Pregnancy loss rate was the number of biochemical pregnancies and spontaneous miscarriages divided by the number of  $\beta$ -HCG positive patients;
- (v) TUNEL positivity rate was the number of patients with DNA fragmentation  $>10\%$  divided by the number of treatments.

Statistical analysis was performed with SPSS for Windows software package version 10.1 (SPSS, Chicago, IL, USA). The Kolmogorov–Smirnov test was used to determine whether the data were random samples from a normal distribution. The chi-square test or Fisher exact test was used to compare clinical pregnancy rates, pregnancy loss rates and number of previous ART treatments in different groups of patients. *T*-test was applied to analyse maternal age, female BMI and sperm parameters. Spearman's rank correlation, valid for not normally distributed data, was applied to determine the correlation between DNA fragmentation and sperm parameters and between DNA fragmentation and fertilization rate. Statistical differences were considered significant at  $P < 0.05$  and highly significant at  $P < 0.01$ .

#### Results

In the overall group of ART patients (ICSI + IVF), the clinical pregnancy rate was 22.7%. Biochemical pregnancy and miscarriage rates were 15 and 10%, respectively. Clinical pregnancy rate was 24% in 50 couples undergoing ICSI cycles; biochemical pregnancy and miscarriage rates were 11.8 and 17.6%, respectively. Clinical pregnancy rate was 21.9% in 82 couples undergoing an IVF cycle; biochemical pregnancy and miscarriage rates were 17.4 and 4.3%, respectively.

Patients were divided into groups according to the extent of sperm DNA fragmentation, using a DNA fragmentation threshold value of 10% (Benchaib *et al.*, 2003). Of the 132 males examined, 43 (32.6%) were TUNEL positive (DNA fragmentation  $>10\%$ ). Sixty-nine of the 82 males undergoing IVF were TUNEL negative (group A) and 13 were TUNEL positive (group B). Twenty of the 50 ICSI males were TUNEL negative (group C) and 30 were TUNEL positive (group D). Both age and BMI of women of group A and B were not statistically different (age:  $37.5 \pm 3.75$  and  $35.61 \pm 3.42$  years, respectively,  $P = 0.095$ ; BMI:  $22.35 \pm 3.21$  and  $23.17 \pm 3.64$  kg/m<sup>2</sup>, respectively,  $P = 0.411$ ); also age and BMI of women in group C and D were not statistically different (age:  $36.95 \pm 4.91$  and  $36.72 \pm 4.92$  years, respectively,  $P = 0.872$ ; BMI:  $21.43 \pm 2.64$  and  $21.76 \pm 3.12$  kg/m<sup>2</sup>, respectively,  $P = 0.699$ ). There was no statistical difference in the number of couples who underwent previous ART treatment between groups A and B and between

groups C and D ( $P = 0.356$  and  $P = 1.000$ , respectively), (Table I). Moreover, there was not a statistical difference between groups A and B and between groups C and D as regards the mean values of sperm parameters (mean values and  $P$ -values in Table I).

### DNA fragmentation and sperm characteristics

Table II summarizes the results of correlation analysis between DNA fragmentation and sperm parameters. Highly significant negative correlations ( $P < 0.01$ ) were observed between sperm DNA fragmentation and all sperm parameters (total number, concentration, motility and morphology), before and after discontinuous gradient centrifugation.

### DNA fragmentation and ART outcome

#### Fertilization rate

A correlation analysis was carried out to determine the relationship between fertilization rate and sperm DNA fragmentation in both ICSI and IVF treatments. The fertilization rate does not appear to have been affected by sperm DNA fragmentation in ICSI ( $r = -0.159$ ;  $P = 0.271$ ), whereas in IVF there was a slight negative correlation between the two parameters ( $r = -0.219$ ;  $P = 0.049$ ).

#### Clinical pregnancy and pregnancy loss

We evaluated the possible relationship between sperm TUNEL positivity (threshold = 10%) and clinical pregnancy and pregnancy loss in both IVF and ICSI groups (Table I).

As regards the IVF group, clinical pregnancy rates were not statistically significantly different in group A and group B (A versus B = 23.2 versus 15.4%;  $P = 0.723$ ); pregnancy loss rates were also not statistically significantly different in group A and group B (A versus B = 15.8 versus 50%;  $P = 0.194$ ).

In the ICSI group, a highly significant difference was found between group C and group D as regards clinical pregnancy rates (C versus D = 45 versus 10%;  $P = 0.007$ ). There was also a highly significant difference in pregnancy loss between groups C and D, with no biochemical pregnancies or miscarriages found in group C (C versus D = 0 versus 62.5%;  $P = 0.009$ ).

We also tested the possible relationship between DNA fragmentation and clinical pregnancy and pregnancy loss using a 20% threshold, as suggested by other authors (Seli *et al.*, 2004). The results did not significantly change: (i) in the ICSI

**Table II.** Correlation analysis between sperm parameters and sperm DNA fragmentation, before and after density gradient centrifugation

| Sperm parameter                        | Correlation coefficient ( $r$ ) | $P$ -value |
|----------------------------------------|---------------------------------|------------|
| After density gradient centrifugation  |                                 |            |
| Sperm concentration                    | -0.536                          | <0.001     |
| Total sperm motility                   | -0.432                          | <0.001     |
| 'Rapid' sperm motility                 | -0.525                          | <0.001     |
| Normal sperm morphology                | -0.394                          | <0.001     |
| Before density gradient centrifugation |                                 |            |
| Total sperm number                     | -0.314                          | <0.001     |
| Sperm concentration                    | -0.388                          | <0.001     |
| Total sperm motility                   | -0.336                          | <0.001     |
| 'Rapid' sperm motility                 | -0.475                          | <0.001     |
| Normal sperm morphology                | -0.254                          | 0.003      |

The sperm parameters analysed were total number, concentration, total motility, 'rapid' motility (grade A motility, WHO, 1999) and normal morphology. After density gradient centrifugation and sperm resuspension in 1 ml of culture medium, sperm concentration coincided with total sperm number.

group, clinical pregnancy and pregnancy loss rates were statistically significantly different in patients with high and low sperm DNA fragmentation ( $P = 0.04$  and  $P = 0.02$ , respectively) and (ii) in IVF group, clinical pregnancy and pregnancy loss rates were not statistically different in the two group of patients ( $P = 1.000$ ).

### Sperm parameters and ART outcome

#### Clinical pregnancy and pregnancy loss

We evaluated the relationship between sperm parameters (concentration, motility and morphology), measured on semen before discontinuous gradient centrifugation, and clinical pregnancy and pregnancy loss in both IVF and ICSI groups. In particular, we used WHO threshold levels for normal concentration ( $\geq 20 \times 10^6/\text{ml}$ ), motility (progressive motility  $\geq 50\%$ ) and morphology (normal forms  $\geq 30\%$ ). In both IVF and ICSI groups, there was no statistically significant difference in pregnancy rates between patients with normal or abnormal concentration, motility and morphology. These sperm parameters did not even appear to affect the onset of pregnancy loss: no significant difference in pregnancy loss rates was found between patients with normal or abnormal concentration, motility and morphology (Table III).

**Table I.** Relationship between TUNEL positivity (low TUNEL  $<10\%$ , groups A and C; high TUNEL  $\geq 10\%$ , groups B and D) and previous ART treatments, maternal age, female BMI, sperm parameters (before density gradient centrifugation), clinical pregnancy and pregnancy loss rates

|                                                 | IVF                           |                                |            | ICSI                          |                                |              |
|-------------------------------------------------|-------------------------------|--------------------------------|------------|-------------------------------|--------------------------------|--------------|
|                                                 | A (low TUNEL)<br>( $n = 69$ ) | B (high TUNEL)<br>( $n = 13$ ) | $P$ -value | C (low TUNEL)<br>( $n = 20$ ) | D (high TUNEL)<br>( $n = 30$ ) | $P$ -value   |
| Previous ART treatments (%)                     | 39.1                          | 23                             | 0.356      | 40                            | 36.6                           | 1.000        |
| Maternal age (years)                            | 37.5 $\pm$ 3.75               | 35.61 $\pm$ 3.42               | 0.095      | 36.95 $\pm$ 4.91              | 36.72 $\pm$ 4.92               | 0.872        |
| Female BMI ( $\text{kg}/\text{m}^2$ )           | 22.35 $\pm$ 3.21              | 23.17 $\pm$ 3.64               | 0.411      | 21.43 $\pm$ 2.64              | 21.76 $\pm$ 3.12               | 0.699        |
| Total sperm number ( $\times 10^6$ )            | 174.59 $\pm$ 171.17           | 137.51 $\pm$ 83.44             | 0.449      | 87.3 $\pm$ 98.01              | 45.48 $\pm$ 50.78              | 0.054        |
| Sperm concentration ( $\times 10^6/\text{ml}$ ) | 69.77 $\pm$ 64.08             | 37.58 $\pm$ 19.06              | 0.078      | 34.86 $\pm$ 35.43             | 19.73 $\pm$ 26.35              | 0.090        |
| Total motile sperm (%)                          | 46.45 $\pm$ 7.72              | 42.54 $\pm$ 7.46               | 0.096      | 40.25 $\pm$ 11.97             | 39.00 $\pm$ 13.16              | 0.735        |
| 'Rapid' motile sperm (%)                        | 10.22 $\pm$ 5.18              | 7.31 $\pm$ 4.39                | 0.061      | 5.75 $\pm$ 6.39               | 3.00 $\pm$ 4.28                | 0.074        |
| Normal sperm morphology (%)                     | 22.9 $\pm$ 10.31              | 19.38 $\pm$ 7.97               | 0.248      | 15.2 $\pm$ 8.29               | 16.2 $\pm$ 6.59                | 0.638        |
| Clinical pregnancy rate (%)                     | 23.2                          | 15.4                           | 0.723      | 45                            | 10                             | <b>0.007</b> |
| Pregnancy loss rate (%)                         | 15.8                          | 50                             | 0.194      | 0                             | 62.5                           | <b>0.009</b> |

**Table III.** Fisher exact test results in both IVF and ICSI groups: relationship between concentration ( $\times 10^6/\text{ml}$ ), progressive motility, morphology (normal forms) and clinical pregnancies and pregnancy loss rates

|                         | IVF                                                          |                                                           |                 | ICSI                                                         |                                                           |                 |
|-------------------------|--------------------------------------------------------------|-----------------------------------------------------------|-----------------|--------------------------------------------------------------|-----------------------------------------------------------|-----------------|
|                         | Sperm concentration ( $\geq 20 \times 10^6$ ml) ( $n = 71$ ) | Sperm concentration ( $< 20 \times 10^6$ ml) ( $n = 11$ ) | <i>P</i> -value | Sperm concentration ( $\geq 20 \times 10^6$ ml) ( $n = 19$ ) | Sperm concentration ( $< 20 \times 10^6$ ml) ( $n = 31$ ) | <i>P</i> -value |
| Clinical pregnancy rate | 23.9%                                                        | 9.1%                                                      | 0.441           | 26.3%                                                        | 22.6%                                                     | 1.000           |
| Pregnancy loss rate     | 15%                                                          | 66.7%                                                     | 0.107           | 16.6%                                                        | 36.4%                                                     | 0.600           |
|                         | Progressive motility                                         |                                                           |                 | Progressive motility                                         |                                                           |                 |
|                         | ( $\geq 50\%$ ) ( $n = 11$ )                                 | (<50%) ( $n = 71$ )                                       | <i>P</i> -value | ( $\geq 50\%$ ) ( $n = 2$ )                                  | (<50%) ( $n = 48$ )                                       | <i>P</i> -value |
| Clinical pregnancy rate | 9.1%                                                         | 23.9%                                                     | 0.441           | 0                                                            | 25%                                                       | 1.000           |
| Pregnancy loss rate     | 0                                                            | 22.7%                                                     | 1.000           | 100%                                                         | 25%                                                       | 0.294           |
|                         | Normal form                                                  |                                                           |                 | Normal form                                                  |                                                           |                 |
|                         | ( $\geq 30\%$ ) ( $n = 21$ )                                 | (<30%) ( $n = 61$ )                                       | <i>P</i> -value | ( $\geq 30\%$ ) ( $n = 3$ )                                  | (<30%) ( $n = 47$ )                                       | <i>P</i> -value |
| Clinical pregnancy rate | 19%                                                          | 23%                                                       | 1.000           | 33.3%                                                        | 23.4%                                                     | 1.000           |
| Pregnancy loss rate     | 20%                                                          | 22.2%                                                     | 1.000           | 0                                                            | 31.3%                                                     | 1.000           |

## Discussion

Semen quality is usually measured by assessing sperm concentration, motility and morphology (WHO, 1999). These parameters, however, are not able to assess alterations in sperm chromatin organization, such as irregular condensation or DNA damage (Bianchi *et al.*, 1996; Sakkas *et al.*, 1998). For this reason, sperm DNA fragmentation should be considered during the assessment of semen quality. Various theories have been put forward to explain sperm DNA damage. Some authors think this damage is due to incomplete maturation of the gametes caused by flawed topoisomerase II activity (Bianchi *et al.*, 1993; Manicardi *et al.*, 1995; Sailer *et al.*, 1995); others suggest that the alteration in genetic material is the result of an incomplete apoptotic process (Gorczyca *et al.*, 1993; Furuki *et al.*, 1996; Rodriguez *et al.*, 1997; Sinha Hikim *et al.*, 1997; Richburg, 2000), whereas other authors believe that sperm DNA damage may be the result of excess ROS production (Aitken *et al.*, 2003). Regardless of sperm DNA damage aetiology, the discovery of cases of male infertility stemming from sperm DNA alteration has raised a new issue. In particular, there is very little information on the possible consequences that fertilization, using sperm with anomalous chromatin organization, may have on embryo development, implantation, gestation and offspring (Sakkas *et al.*, 2000a; Seli and Sakkas, 2005). Therefore, simple circumvention of fertilization using ICSI may not overcome all the possible deleterious effects arising from defective sperm DNA (Seli and Sakkas, 2005).

In our study, sperm DNA damage was evaluated by TUNEL assay, performed on part of the sperm suspension prepared by density gradient centrifugation and used in IVF or ICSI. This practice was utilized by several authors (Sun *et al.*, 1997; Lopes *et al.*, 1998; Duran *et al.*, 2002; Benchaib *et al.*, 2003; Seli *et al.*, 2004). The predictive ability of the sperm DNA integrity test, performed on raw sample, diminishes when spermatozoa are prepared using techniques such as density gradient centrifugation (Sakkas *et al.*, 2000b; Tomlinson *et al.*, 2001; O'Connell *et al.*, 2003; Seli and Sakkas, 2005). The reason why pre-preparation sperm parameters have little prognostic value, in terms of fertilization and pregnancy in ART, may be the 'normalizing' effect of the semen preparation procedure: it

is likely that, regardless of the initial sample, a degree of homogenization occurs after sperm preparation. This indicates a need for assessing the sperm DNA status in the appropriate context, that is, sperm DNA damage in raw semen with reference to natural conception and sperm DNA damage in post-preparation samples in relation to ART (Tomlinson *et al.*, 2001).

Results of the present study point first to a significant relationship between DNA damage, detected by TUNEL assay in semen samples after density gradient centrifugation, and traditional sperm evaluation parameters. In particular, a highly significant negative correlation was found between degree of DNA fragmentation and total number, concentration, motility and morphology of sperm in both native and treated semen samples (Table II). This result is corroborated by data from other studies (Sun *et al.*, 1997; Irvine *et al.*, 2000; Benchaib *et al.*, 2003). The detection of a close relationship between DNA fragmentation and poor semen quality is reasonable given the aetiology of sperm DNA damage: factors involved in triggering DNA fragmentation (alteration of maturation process, abortive apoptosis or unbalanced ROS production) may also compromise sperm structure and function (Sharma *et al.*, 2004). This close relationship is particularly important in ARTs, where the sperm introduced is often selected by an operator (ICSI), the sperm parameters are often 'critical' and, consequently, the risk of injecting sperm with damaged DNA into the oocyte is increased.

Existing data regarding the relationship between sperm DNA integrity and fertilization and pregnancy rates are conflicting (Sun *et al.*, 1997; Tomlinson *et al.*, 2001; Morris *et al.*, 2002; Benchaib *et al.*, 2003; Henkel *et al.*, 2004; Seli and Sakkas, 2005). Our data show no relationship between sperm DNA damage and fertilization rates in ICSI ( $r = -0.159$ ;  $P = 0.271$ ), whereas in IVF only a slight correlation was found between the two parameters ( $r = -0.219$ ;  $P = 0.049$ ). On the other hand, in ICSI, patients with low DNA fragmentation had a statistically higher clinical pregnancy rate ( $P = 0.007$ ), a relationship that was not found in IVF ( $P = 0.723$ ). These results may be accounted for by the fact that high DNA fragmentation probably does not preclude fertilization but prevents the formation of blastocysts and/or successful embryo development (Ahmadi and Ng, 1999). This is in line with data displayed by Seli and

colleagues. In their study, the extent of nuclear DNA damage in spermatozoa was related to embryo development to the blastocyst stage, a time when the embryonic genome is activated, transcriptional activity has begun and the paternal genome plays a significant contributory role in embryo function (Seli *et al.*, 2004). It is in fact widely assumed that the first steps of development are subjected to maternal control and that the expression of paternal genes begins at 4–8 cell stage; it is therefore at this stage that the consequences of paternal DNA-induced alterations may become manifest, impairing embryo development. In IVF, the lack of any difference in clinical pregnancy rates between high TUNEL patients and low TUNEL patients may be explained by the fact that during IVF there is a kind of ‘natural’ sperm selection. Sperm that are morphologically anomalous, with poor motility and DNA damage, have low fitness in oocyte fertilization. This idea is partially supported by studies indicating that the zona pellucida may be able to ‘identify’ genetically altered spermatozoa (Menkveld *et al.*, 1991; van Dyk *et al.*, 2000).

Our study tried to shed light on any possible relationship between sperm DNA fragmentation and pregnancy loss defined as spontaneous miscarriage or biochemical pregnancy. Our data seem to indicate that, in ICSI, patients with high DNA fragmentation had higher pregnancy loss rates compared to patients with low DNA fragmentation ( $P = 0.009$ ); the same relationship was not found in IVF ( $P = 0.194$ ). These data would seem to substantiate recent studies evaluating the paternal influence on the aetiology of early spontaneous miscarriage (Slama *et al.*, 2005), with particular reference to the increased risk of miscarriage because of paternal age and hence sperm chromatin anomalies. Some authors have also carried out DNA fragmentation analyses, using the TUNEL technique, in patients with a history of unexplained recurrent pregnancy loss (RPL) (Carrell and Liu, 2003), showing that many patients with RPL display a significant increase in sperm DNA fragmentation. Parallel studies furthermore show that RPL patients have other genetic alterations such as sperm chromosome aneuploidy (Rubio *et al.*, 1999, 2001; Carrell *et al.*, 2003). The onset of biochemical pregnancy or early miscarriage may in fact be the result of blocked embryo development because of paternal genomic anomalies. The oocyte is able to trigger repair mechanisms in those cases where it recognizes the presence of sperm damaged DNA. In particular, the oocyte is able to fully repair single-strand DNA breaks. However, if a high level of double-strand DNA breaks are present, the oocyte can produce ‘mistakes’, generating genetic mutations that can later block or alter embryo development (Braude *et al.*, 1988).

Several studies have stressed the importance of traditional sperm parameters as predictors of fertility potential (Nallella *et al.*, 2006). Because of the evidence of correlations between sperm DNA fragmentation and clinical pregnancy and pregnancy loss rates in the ICSI group, we also tried to find a relationship between traditional sperm evaluation parameters (concentration, motility and morphology) and pregnancy and pregnancy loss rates in IVF and ICSI groups. In our study, we tried to evaluate the importance of each parameter, individually analysed using current WHO reference values. Our data demonstrate that in both IVF and ICSI groups, sperm quality

parameters do not statistically affect clinical pregnancy and pregnancy loss rates (Table III). These results seem to indicate that, despite the strong correlations between traditional sperm parameters and DNA damage and despite the importance of sperm parameters in the evaluation of male infertility (Nallella *et al.*, 2006), the analysis of sperm DNA fragmentation has a better predictive value for ART procedure outcome than the use of traditional sperm parameters evaluation. This is in line with others studies indicating that assessment of sperm DNA integrity is more objective and reproducible than analysis of conventional semen parameters (Evenson *et al.*, 1991; Zini *et al.*, 2001) which are characterized by large within- and between-subject variation (Keel, 2006).

In conclusion, our data indicate that sperm DNA fragmentation significantly affects embryo post-implantation development in ICSI: clinical pregnancy and pregnancy loss rates were significantly different in patients with high and low sperm DNA fragmentation. In particular, we show, for the first time, that sperm DNA fragmentation may compromise progression of pregnancy, resulting in spontaneous miscarriage or biochemical pregnancy following ART. This study also underlines the better predictive value of DNA fragmentation analysis versus traditional sperm parameter evaluation in ART procedure outcome.

Given the importance of sperm DNA integrity, the real cause of DNA damage needs to be assessed with a view to identify proper therapeutic treatment. Furthermore, the development and correct use of methods for selecting sperm with undamaged DNA should be studied carefully, especially where ICSI is strongly recommended.

### Acknowledgement

The authors thank Mr Stephen Jewkes for the linguistic revision of the final version of manuscript.

### References

- Ahmadi A and Ng SC (1999) Fertilizing ability of DNA-damaged spermatozoa. *J Exp Zool* 284,696–704.
- Aitken RJ, Baker MA and Sawyer D (2003) Oxidative stress in the male germ line and its role in the aetiology of male infertility and genetic disease. *Reprod Biomed Online* 7,65–70.
- Benchaib M, Braun V, Lornage J, Hadj S, Salle B, Lejeune H and Guérin JF (2003) Sperm DNA fragmentation decreases the pregnancy rate in an assisted reproductive technique. *Hum Reprod* 18(5),1023–1028.
- Bianchi PG, Manicardi GC, Bizzaro D, Sakkas D and Bianchi U (1993) A cytochemical study of mouse mature spermatozoa after C-banding treatment. *Eur J Histochem* 37,155–159.
- Bianchi PG, Manicardi GC, Urner F, Campana A and Sakkas D (1996) Chromatin packaging and morphology in ejaculated human spermatozoa: evidence of hidden anomalies in normal spermatozoa. *Mol Hum Reprod* 2,139–144.
- Borini A, Tallarini A, Maccolini A, Dal Prato L and Flamigni C (2004a) Perifollicular vascularity monitoring and scoring; a clinical tool for selecting the best oocyte. *Eur J Obstet Gynecol Reprod Biol* 115,102–105.
- Borini A, Bonu MA, Coticchio G, Bianchi V, Cattoli M and Flamigni C (2004b) Pregnancies and births after oocyte cryopreservation. *Fertil Steril* 82(3),601–605.
- Braude P, Bolton V and Moore S (1988) Human gene expression first occurs between the four- and eight-cell stages of preimplantation development. *Nature* 332,459–461.
- Carrell DT and Liu L (2003) Sperm DNA fragmentation is increased in couples with unexplained recurrent pregnancy loss. *Arch Androl* 49,49–55.
- Carrell DT, Wilcox AL, Lowy L, Peterson CM, Jones KF, Erickson L, Campbell B, Branch DW and Hatasaka HH (2003) Elevated sperm chromosome

- aneuploidy and apoptosis in patients with unexplained recurrent pregnancy loss. *Obstet Gynecol* 101(6),1229–1235.
- Duran EH, Morshedi M, Taylor S and Oehninger S (2002) Sperm DNA quality predicts intrauterine insemination outcome: a prospective cohort study. *Hum Reprod* 17(12),3122–3128.
- van Dyk Q, Lanzendorf S, Kolm P, Hodgen DJ and Mahony MC (2000) Incidence of aneuploid spermatozoa from subfertile man: selected with motility versus hemizona bound. *Hum Reprod* 15,1529–1536.
- Evenson DP, Jost LK, Baer RK, Turner TW and Schrader SM (1991) Individuality of DNA denaturation patterns in human sperm as measured by the sperm chromatin structure assay. *Reprod Toxicol* 5(2),115–125.
- Furuki T, Masuko K, Nishimune Y, Obinata M and Matsui Y (1996) Inhibition of testicular germ cells apoptosis and differentiation in mice misexpressing Bcl-2 in spermatogonia. *Development* 122,1703–1709.
- Gorczyca W, Gong J and Darzynkiewicz Z (1993) Detection of DNA strand breaks in individual apoptotic cells by the *in situ* terminal deoxynucleotidyl transferase and nick translation assays. *Cancer Res* 53,1945–1951.
- Hammadeh ME, al-Hasani S, Stieber M, Rosenbaum P, Kupker D, Diedrich K and Schmidt W (1996) The effect of chromatin condensation (aniline blue staining) and morphology (strict criteria) of human spermatozoa on fertilization, cleavage and pregnancy rates in an intracytoplasmic sperm injection programme. *Hum Reprod* 11,2468–2471.
- Henkel R, Hajimohammad M, Staf T, Hoogendijk C, Mehnert C, Menkveld R, Gips H, Schill WB and Kruger TF (2004) Influence of deoxyribonucleic acid damage on fertilization and pregnancy. *Fertil Steril* 81(4),965–972.
- Hjollund NH, Bonde JP, Ernst E, Lindenberg S, Andersen AN and Olsen J (2005) Spontaneous Abortion in IVF couples. A role of male welding exposure. *Hum Reprod* 20(7),1793–1797.
- Irvine DS, Twigg J, Gordon EL, Fulton N, Milne PA and Aitken RJ (2000) DNA integrity in human spermatozoa: relationship with semen quality. *J Androl* 21,33–34.
- Janny L and Menezo YJR (1994) Evidence for a strong paternal effect on human preimplantation embryo development and blastocyst formation. *Mol Reprod Dev* 38,36–42.
- Keel BA (2006) Within- and between-subject variation in semen parameters in infertile men and normal semen donors. *Fertil Steril* 85(1),128–134.
- Larson KL, DeJonge CJ, Barnes AM, Jost LK and Evenson DP (2000) Sperm chromatin structure assay parameters as predictors of failed pregnancy following assisted reproductive techniques. *Hum Reprod* 15,1717–1722.
- Lopes S, Sun JC, Jurisicova A, Meriano J and Casper RF (1998) Sperm deoxyribonucleic acid fragmentation is increased in poor-quality semen samples and correlates with failed fertilization in intracytoplasmic sperm injection. *Fertil Steril* 69(3),528–532.
- Manicardi GC, Bianchi PG, Pantano S, Azzoni P, Bizzaro D, Bianchi U and Sakkas D (1995) Presence of endogenous nicks in DNA of ejaculated human spermatozoa and its relationship to chromomycin A<sub>3</sub> accessibility. *Biol Reprod* 52,864–867.
- Marchetti F, Lowe X, Bishop J and Wyrobek AJ (1999) Absence of selection against aneuploid mouse sperm at fertilization. *Biol Reprod* 61,948–954.
- Menkveld R, Franken DR, Kruger TF, Oehninger S and Hodgen GD (1991) Sperm selection capacity of human zona pellucida. *Mol Reprod Dev* 30(4),346–352.
- Moosani N, Pattinson HA, Carter M, Cox DM, Rademaker AW and Martin RH (1995) Chromosomal analysis of sperm from man with idiopathic infertility using sperm karyotyping and fluorescence *in situ* hybridization. *Fertil Steril* 64,811–817.
- Morris ID, Illott S, Dixon L and Brison DR (2002) The spectrum of DNA damage in human sperm assessed by single cell gel electrophoresis (Comet Assay) and its relationship to fertilization and embryo development. *Hum Reprod* 17,990–998.
- Nallella KP, Sharm RK, Aziz N and Agarwal A (2006) Significance of sperm characteristics in the evaluation of male infertility. *Fertil Steril* 85(3),629–634.
- O'Connell M, McClure N, Powell LA, Steele EK and Lewis SE (2003) Differences in mitochondrial and nuclear DNA status of high-density and low-density sperm fractions after density centrifugation preparation. *Fertil Steril* 79(1),754–762.
- Olshan AF and Faustman EM (1993) Male-mediated developmental toxicity. *Reprod Toxicol* 7,191–202.
- Perinaud J, Mieuisset R, Vieitez G, Labal B and Ricoilley G (1993) Influence of sperm parameters on embryo quality. *Fertil Steril* 60,888–892.
- Richburg JH (2000) The relevance of spontaneous- and chemically-induced alterations in testicular germ cell apoptosis to toxicology. *Toxicol Lett* 112,11379–11386.
- Rodriguez I, Ody C, Araki K, Garcia I and Vassalli P (1997) An early and massive wave of germinal cell apoptosis is required for the development of functional spermatogenesis. *EMBO J* 16,2262–2270.
- Rubio C, Simon C, Blanco V, Vidal F, Minguez Y and Egozcue J (1999) Implications of sperm chromosome abnormality in recurrent miscarriage. *J Assist Reprod Genet* 16,253–258.
- Rubio C, Gil-Salom M, Simon C, Vidal F, Rodrigo L and Minguez Y (2001) Incidence of sperm chromosomal abnormality in a risk population: relationship with sperm quality and ICSI outcome. *Hum Reprod* 16,2084–2092.
- Sailer BL, Jost LK and Evenson DP (1995) Mammalian sperm DNA susceptibility to *in situ* denaturation associated with the presence of DNA strand breaks as measured by the terminal deoxynucleotidyl transferase assay. *J Androl* 16,80–87.
- Sakkas D, Manicardi GC, Bizzaro D and Bianchi PG (2000a) Possible consequences of performing intracytoplasmic spermatozoa injection (ICSI) with sperm possessing nuclear DNA damage. *Hum Fertil* 3,26–30.
- Sakkas D, Manicardi GC, Tomlinson M, Mandrioli M, Bizzaro D, Bianchi PG and Bianchi U (2000b) The use of two density gradient centrifugation techniques and the swim-up method to separate spermatozoa with chromatin and nuclear DNA anomalies. *Hum Reprod* 15(5),1112–1116.
- Sakkas D, Urner F, Bizzaro D, Manicardi GC, Bianchi PG, Shoukir Y and Campana A (1998) Sperm nuclear DNA damage and altered chromatin structure: effect on fertilization and embryo development. *Hum Reprod* 13(4),11–19.
- Sanchez R, Staf T, Khanaga O, Turley H, Gips H and Schill WB (1996) Sperm selection methods for intracytoplasmic sperm injection (ICSI) and andrological patients. *J Assist Reprod Genet* 13,228–233.
- Seli E and Sakkas D (2005) Spermatozoal nuclear determinants of reproductive outcome: implications for ART. *Hum Reprod Update* 11(4),337–349.
- Seli E, Gardner DK, Scho-olcraft WB, Moffatt O and Sakkas D (2004) Extent of nuclear DNA damage in ejaculated spermatozoa impacts on blastocyst development after *in vitro* fertilization. *Fertil Steril* 82(2),378–383.
- Sharma RK, Said T and Agarwal A (2004) Sperm DNA damage and its clinical relevance in assessing reproductive outcome. *Asian J Androl* 6,139–148.
- Shoukir Y, Chardonens D, Campana A and Sakkas D (1998) Blastocyst development from supernumerary embryos after intracytoplasmic sperm injection: a paternal influence? *Hum Reprod* 13,1632–1637.
- Sinha Hikim AP, Rajavashisth TB, Sinha Hikim I, Lue Y, Bonavera JJ, Leung A, Wang C and Swerdloff RS (1997) Significance of apoptosis in the temporal and stage-specific loss of germ cells in the adult rat after gonadotropin deprivation. *Biol Reprod* 57,1193–1201.
- Slama R, Bouyer J, Windham G, Fenster L, Werwatz A and Swan SH (2005) Influence of paternal age on the risk of spontaneous abortion. *Am J Epidemiol* 161(9),816–823.
- Spano M, Bonde JP, Hjollund HI, Kolstad HA, Cordelli E and Leter G (2000) Sperm chromatin damage impairs human fertility. The Danish First Pregnancy Planner Study Team. *Fertil Steril* 73,43–50.
- Sun JG, Jurisicova A and Camper RF (1997) Detection of deoxyribonucleic acid fragmentation in human sperm: correlation with fertilization *in vitro*. *Biol Reprod* 56,602–607.
- Tomlinson MJ, Moffat O, Manicardi GC, Bizzaro D, Afnan M and Sakkas D (2001) Interrelationships between seminal parameters and sperm nuclear DNA damage before and after density gradient centrifugation: implications for assisted conception. *Hum Reprod* 16,2160–2165.
- Vanderzwalmen P, Berin-Segal G, Geertz L, Debauche C and Schoysman R (1991) Sperm morphology and IVF pregnancy rate: comparison between Percoll gradient centrifugation and swim-up procedures. *Hum Reprod* 6,581–588.
- WHO (World Health Organization) (1999) *WHO Laboratory Manual for Examination of Human Semen*. Cambridge University Press, Cambridge.
- Zini A, Bielecki R, Phang D and Zenzes MT (2001) Correlations between two markers of sperm DNA integrity, DNA denaturation and DNA fragmentation, in fertile and infertile men. *Fertil Steril* 75,674–677.

Submitted on February 23, 2006; resubmitted on April 14, 2006, May 22, 2006; accepted on May 25, 2006
